# Supplementary material for: Temporal and Spatial Analyses of Forest Burnt Area in the Middle Volga Region Based on the Satellite Imagery and Climatic Factors
Source: Preprints.org preprint supplement (doi:10.20944/preprints202401.1362.v1), 2024-01-18
Supplement: Supplementary file 3 [file supplementary]

## Sheet: Лист1
	Table S1. Condusion matrix for accuracy assessment of BA detection
Years	2000	2001	2002	2003	2004	2005	2006	2007	2008	2009	2010	2011	2012	2013	2014	2015	2016	2017	2018	2019	2020	2021	2022	Total	Comission error	User's accuracy
2000	228	2	5	6	5	9	5	2	7	4	25			4				4	2					308	0.25974	0.74026
2001	2	268	4				1	3	27	2	33	2	7	5		5		5				1	6	371	0.272237	0.722372
2002		12	786	9	10													10		8			11	846	0.070922	0.929078
2003	17	10	5	293	3	8	2	9	7	5	22					3	2	12	2	1		1	10	412	0.288835	0.711165
2004	2	4	3	1	314	2	1	3	1	4	9		2		3			5	3		12		1	370	0.151351	0.848649
2005	2		3	1		90					5							2	4	2				109	0.174312	0.825688
2006							67				3				1			2						73	0.0821918	0.917808
2007			3					69			8													80	0.1375	0.8625
2008		2	16		2	2	8		206	2	26		3		4								1	272	0.242647	0.757353
2009	7	1	5	7	8	8	1	3	15	262	8	4	1	5				4	3		11		2	355	0.261972	0.738028
2010			24					5			1527		1		17		1	20	2	5		12	15	1629	0.0626151	0.937385
2011											2	33						1						36	0.0833333	0.916667
2012											5	3	68							1				77	0.116883	0.883117
2013											14		1	96										111	0.135135	0.864865
2014			5				1				15		3		206			6						236	0.127119	0.872881
2015														13		61								74	0.175676	0.824324
2016																	46	3		2				51	0.0980392	0.901961
2017	3	2	6	2	10	1	2	3	5	35	69	4		3	55	7	6	891	6	5	20		1	1136	0.215669	0.784331
2018			1								8				2				108					119	0.092437	0.907563
2019			12								11					2				122		11		158	0.227848	0.772152
2020	4	2	3	5	2	5		4	3	1	22		3		3	2	1	2	15	2	310	3	6	398	0.221106	0.778894
2021																8		9				295		312	0.0544872	0.945513
2022											32											8	328	368	0.108696	0.891304
Total	265	303	881	324	354	125	88	101	271	315	1844	46	89	126	291	88	56	976	145	148	353	331	381	7901		0.840603
Omissison error	0.139623	0.115512	0.107832	0.095679	0.112994	0.28	0.238636	0.316832	0.239852	0.168254	0.171909	0.282609	0.235955	0.238095	0.292096	0.306818	0.178571	0.0870902	0.255172	0.175676	0.121813	0.108761	0.139108		6674
Producer's accuracy (PA)	0.860377	0.884488	0.892168	0.904321	0.887006	0.72	0.761364	0.683168	0.760148	0.831746	0.828091	0.717391	0.764045	0.761905	0.707904	0.693182	0.821429	0.91291	0.744828	0.824324	0.878187	0.891239	0.860892	0.808309
F-score	0.795812	0.795252	0.910249	0.796196	0.867403	0.769231	0.832298	0.762431	0.758748	0.78209	0.879355	0.804878	0.819277	0.810127	0.781784	0.753086	0.859813	0.84375	0.818182	0.797386	0.825566	0.917574	0.875834	18.8563
Overall accuracy	0.845
Kappa	0.828
F-score	81.984
UA	0.84
PA	0.808309
